# Supplementary material for: Tuberculosis exposure, infection and disease in children: a systematic diagnostic approach
Source: PubMed Central journal article supplement (PMC5471717; doi:10.1186/s41479-016-0023-9), 2016-11-24
Supplement: 41479_2016_23_MOESM1_ESM.pdf [file 41479_2016_23_MOESM1_ESM.pdf]

## SUPPLEMENTARY ON-LINE MATERIAL

**Supplementary Table 1.** Differential diagnosis of chronic cough in children

| Cause                                                                                                                | Nature of Cough                                                                                                               | Associated Features                                                                                                                                | Response to Therapy                                                                      |
|----------------------------------------------------------------------------------------------------------------------|-------------------------------------------------------------------------------------------------------------------------------|----------------------------------------------------------------------------------------------------------------------------------------------------|------------------------------------------------------------------------------------------|
| <b>Infectious diseases</b>                                                                                           |                                                                                                                               |                                                                                                                                                    |                                                                                          |
| <b>Pulmonary tuberculosis</b>                                                                                        | Wet, persistent & unremitting cough. Mucopurulent sputum; rarely bloody (with underlying bronchiectasis or cavitory disease). | Variable fever. Failure to thrive / malnutrition. Exposure to TB; fatigue or decreased activity/playfulness; mediastinal, hilar lymphadenopathies. | Not resolved with trial of antibiotics. Significant improvement with TB treatment        |
| <b>Lymph node tuberculosis</b>                                                                                       | Dry, persistent & unremitting cough.                                                                                          | Variable fever. Failure to thrive / malnutrition. Subacute onset; wheezing or stridor.                                                             | No response to bronchodilators or antibiotics; Significant improvement with TB treatment |
| <b>Recurrent viral respiratory tract infection</b>                                                                   | Acute-onset cough, initially dry then wet                                                                                     | Recurrent fever. Normal nutritional status. Especially infants; coryza, sore throat; improvement between episodes.                                 | Delayed recovery, with back-to-back relapses; no response to antibacterials.             |
| <b>Bronchiolitis</b>                                                                                                 | Cough marked at onset, with steady improvement.                                                                               | Fever at onset, then resolves. Normal nutritional status. Wheezing; infants.                                                                       | Responsive to general supportive measures.                                               |
| <b>Pertussis-like syndrome</b> (e.g., <i>Bordetella</i> ; <i>Chlamydomphila</i> ; <i>Mycoplasma</i> ; resp. viruses) | Intractable, loud, dry, paroxysmal cough; not always with inspiratory whoop. Small amounts of viscid clear sputum.            | Fever at onset, then resolves. Normal nutritional status. Not immunized; subconjunctival hemorrhages.                                              | Can be very slow to resolve, antibiotics have limited impact                             |
| <b>Protracted bacterial bronchitis</b> (e.g., <i>S. pneumoniae</i> ; <i>H. influenzae</i> ; <i>M. catarrhalis</i> )  | Persistent wet-moist cough with delayed recovery. Mucopurulent sputum.                                                        | Fever at onset, then resolves. Normal nutritional status. Especially young children (< 5 y.o.), who otherwise appear well.                         | Resolves with prolonged (>2-weeks) oral antibiotics                                      |
| <b>Recurrent bacterial pneumonia</b>                                                                                 | Acute-onset cough, then improvement, then relapse. Mucopurulent sputum.                                                       | Recurrent fever. Failure to thrive / malnutrition. Improvement between episodes; may be HIV-related.                                               | Resolves with antibiotics                                                                |
| <b>Chronic bacterial rhinosinusitis</b>                                                                              | Persistent cough, worse when lying down.                                                                                      | Fever at onset, then resolves. Normal nutritional status. Postnasal drainage.                                                                      | Resolves with appropriate treatment                                                      |
| <b>Allergic disease</b>                                                                                              |                                                                                                                               |                                                                                                                                                    |                                                                                          |
| <b>Allergic chronic</b>                                                                                              | Variable cough, worse                                                                                                         | Fever absent unless assoc. with                                                                                                                    | Can be controlled with                                                                   |

|                                                |                                                                                                                  |                                                                                                                                                                                                                                                        |                                                                                                                  |
|------------------------------------------------|------------------------------------------------------------------------------------------------------------------|--------------------------------------------------------------------------------------------------------------------------------------------------------------------------------------------------------------------------------------------------------|------------------------------------------------------------------------------------------------------------------|
| <b>rhinosinusitis</b>                          | when lying down.                                                                                                 | secondary infection. Normal nutritional status. Nasal congestion & postnasal drainage; frequent clearing of throat.                                                                                                                                    | ongoing combination of allergen avoidance, medications, immunotherapy.                                           |
| <b>Cough-dominant asthma</b>                   | Recurrent episodes of cough, usually dry, worse at night. May be productive of thick/mucoid sputum.              | Fever absent unless assoc. with secondary infection. Normal nutritional status. May be accompanied by wheezing & dyspnea.                                                                                                                              | Responsive to bronchodilators & glucocorticoids                                                                  |
| <b>Mucociliary disorders</b>                   |                                                                                                                  |                                                                                                                                                                                                                                                        |                                                                                                                  |
| <b>Cystic fibrosis</b>                         | Persistent wet cough. Copious viscid mucopurulent sputum.                                                        | Variable fever. Failure to thrive / malnutrition. Begins in early childhood; bronchiectasis; frequent wheezing; clubbing; generally Caucasian.                                                                                                         | Acute exacerbations resolve with antibiotics; chronic cough ameliorated with daily pulmonary hygiene therapies.  |
| <b>Primary ciliary dyskinesia</b>              | Persistent moist cough. Mucoid or purulent sputum.                                                               | Fever absent (even sometimes during exacerbations). Normal nutritional status. Bronchiectasis; occasional wheezing; chronic rhinosinusitis, recurrent otitis media; may have situs inversus.                                                           | Acute exacerbations resolve with antibiotics; chronic cough ameliorated with daily pulmonary hygiene therapies.  |
| <b>Aspiration syndromes</b>                    |                                                                                                                  |                                                                                                                                                                                                                                                        |                                                                                                                  |
| <b>Gastroesophageal reflux disease (GERD)</b>  | Dry cough with variable persistence, worse at night, sometimes associated with stridor and wheezing; hoarseness. | Fever absent unless assoc. with aspiration-related lower respiratory tract infection. Failure to thrive (especially in severe cases). Children with neurologic abnormalities are at greater risk for aspiration complications (pneumonitis/pneumonia). | Usually responsive to dietary and medical measures.<br><br>Dysphagia cases may be responsive to swallow therapy; |
| <b>Retained foreign body</b>                   | Persistent cough.                                                                                                | Fever absent unless assoc. with secondary infection. Normal nutritional status. Especially toddlers; choking episode at onset of aspiration.                                                                                                           | Removal of aspirated foreign body by rigid bronchoscopy.                                                         |
| <b>Others</b>                                  |                                                                                                                  |                                                                                                                                                                                                                                                        |                                                                                                                  |
| <b>Lymphoid interstitial pneumonitis (LIP)</b> | Persistent cough.                                                                                                | Variable fever. Variable nutritional status. HIV-infected; parotid enlargement; persistent generalized lymphadenopathy; clubbing.                                                                                                                      | Responsive to corticosteroids.                                                                                   |

|                                 |                                                                         |                                                                                                                                                                                             |                                                                                    |
|---------------------------------|-------------------------------------------------------------------------|---------------------------------------------------------------------------------------------------------------------------------------------------------------------------------------------|------------------------------------------------------------------------------------|
| <b>Tracheomalacia (TM)</b>      | Brassy cough, expiratory stridor, wheezing. Thin, clear, scarce sputum. | Fever absent unless assoc. with secondary infection. Normal nutritional status. Laryngeal clefts, tracheoesophageal fistula, bronchomalacia.                                                | Mild congenital TM improves as the infant grows. Severe TM requires surgical care. |
| <b>Congestive heart failure</b> | Persistent cough; worse at night. Thin, frothy sputum.                  | Fever absent unless assoc. with secondary infection. Failure to thrive / malnutrition. Pulm. edema; exercise intolerance & easy fatigue; respiratory distress with tachypnea; hepatomegaly. | Depends on the underlying etiology.                                                |

**LIP:** lymphoid interstitial pneumonitis; **TB:** tuberculosis; **TM:** tracheomalacia

Adapted from C.M. Perez-Velez. Diagnosis of Intrathoracic Tuberculosis in Children. In: Handbook of Child and Adolescent Tuberculosis (p. 162-165), J.R. Starke and P.R. Donald (Eds.), 2016, New York, NY: Oxford University Press. Copyright by Oxford University Press [15]. Adapted with permission.

**Supplementary Table 2.** Nucleic acid amplification tests for detecting *Mycobacterium tuberculosis* complex and genes encoding targets of mutations conferring drug resistance

| NAAT                                                              | Type             | Gene Encoding Target            | Drug-Resistance: Gene Encoding Target of Mutations     | Analytical Sensitivity (Limit of Detection) (CFU/mL) | Recommended Smear Status for Detecting <i>M. tb</i> | Turnaround Time    | Required Risk Level of Laboratory | Year of Release          | Endorsement/ Approval |
|-------------------------------------------------------------------|------------------|---------------------------------|--------------------------------------------------------|------------------------------------------------------|-----------------------------------------------------|--------------------|-----------------------------------|--------------------------|-----------------------|
| <b>GenoType MTBDR<sub>pl</sub>us</b> version 2 (Hain Lifescience) | Line probe assay | - <i>M. tb</i> complex: 23SrRNA | - Rmp: <i>rpoB</i><br>- INH: <i>katG</i> ; <i>inhA</i> | 1000-10,000                                          | Only positive                                       | 4-6 hours (manual) | High                              | 2012 (version 1 in 2004) | WHO                   |
| <b>GenoType MTBDR<sub>sl</sub></b>                                | Line probe       | - <i>M. tb</i> complex: 23SrRNA | - Fluoroquinolones:                                    | 1000-10,000                                          | Only positive                                       | 4-6 hours (manual) | High                              | 2012 (version 1)         | WHO                   |

|                                           |                  |                                                                                                   |                                                                                         |             |                     |                       |          |          |            |
|-------------------------------------------|------------------|---------------------------------------------------------------------------------------------------|-----------------------------------------------------------------------------------------|-------------|---------------------|-----------------------|----------|----------|------------|
| version 2<br>(Hain Lifescience)           | assay            |                                                                                                   | <i>gyrA</i><br>- Aminoglycosides &<br>Cyclic Peptides: <i>rrs</i><br>- Emb: <i>embB</i> |             |                     |                       |          | in 2009) |            |
| <b>Genoscholar NTM + MDRTB</b><br>(Nipro) | Line probe assay | - <i>M. tb</i> complex<br>- <i>M. avium</i><br>- <i>M. intracellulare</i><br>- <i>M. kansasii</i> | - Rmp: <i>rpoB</i><br>- INH: <i>katG</i> ; <i>inhA</i>                                  | 1000-10,000 | Only positive       | 4-6 hours (manual)    | High     | 2012     | WHO        |
| <b>COBAS TaqMan MTD Test</b><br>(Roche)   | RT-PCR           | - <i>M. tb</i> complex: 16S rRNA                                                                  | N/A                                                                                     | 20          | Only positive       | 6.5 hours (automated) | Moderate | 2010     | FDA        |
| <b>Xpert MTB/RIF</b><br>(Cepheid)         | RT-PCR           | - <i>M. tb</i> complex: <i>rpoB</i>                                                               | - Rmp: <i>rpoB</i>                                                                      | 100-150     | Positive & Negative | 1-2 hours (automated) | Low      | 2010     | WHO<br>FDA |
| <b>Xpert MTB/RIF Ultra</b><br>(Cepheid)   | RT-PCR           | - <i>M. tb</i> complex: <i>rpoB</i>                                                               | - Rmp: <i>rpoB</i>                                                                      | 10-100      | Positive & Negative | 1-2 hours (automated) | Low      | ? 2017   | N/A        |

**CFU:** colony-forming units; **Emb:** ethambutol; **FDA:** Federal Drug Agency; **INH:** isoniazid; ***M. tuberculosis:*** *Mycobacterium tuberculosis*; **NAAT:** nucleic acid amplification test; **RT-PCR:** real-time polymerase chain reaction; **TAM:** transcription-mediated amplification; **WHO:** World Health Organization.

**Supplementary Table 3:** Differential diagnosis of clinical-radiological syndromes associated with intrathoracic TB in children

| Clinical-Radiological Syndrome | Differential Diagnosis |                |
|--------------------------------|------------------------|----------------|
|                                | Infectious             | Non-Infectious |
|                                |                        |                |

| <b>Lymph Node Disease</b>                                                                     |                                                                                                                                                                                                                                                                                                                                                                                                       |                                                                                                                                                                                                                                                    |
|-----------------------------------------------------------------------------------------------|-------------------------------------------------------------------------------------------------------------------------------------------------------------------------------------------------------------------------------------------------------------------------------------------------------------------------------------------------------------------------------------------------------|----------------------------------------------------------------------------------------------------------------------------------------------------------------------------------------------------------------------------------------------------|
| Lymphadenopathies,<br>Mediastinal/Hilar/Paratracheal<br>- Noncalcified<br>- Calcified (Ranke) | <u>Mycobacteria</u> : <i>M. tb</i> ; MAC<br><u>Fungi</u> : <i>Histoplasma</i> ;<br><i>Coccidioides</i><br><u>Bacteria</u> : <i>B. pertussis</i> , <i>B. henselae</i> (cat scratch disease)<br><u>Viruses</u> : HIV; measles<br><u>Parasite</u> : <i>Toxoplasma</i>                                                                                                                                    | <u>Tumors</u> : lymphoma (Hodgkin's & non-Hodgkin's); lymphangioma; lymphosarcoma; leukemia<br><u>Others</u> : sarcoidosis; hyperplastic thymus (or even normal thymus in infant); teratoma                                                        |
| <b>Parenchymal Lung Disease</b>                                                               |                                                                                                                                                                                                                                                                                                                                                                                                       |                                                                                                                                                                                                                                                    |
| Solitary pulmonary nodule<br>- Noncalcified<br>- Calcified                                    | <u>Mycobacteria</u> : <i>M. tb</i> (primary Ghon focus); MAC<br><u>Fungi</u> : <i>Histoplasma</i> ;<br><i>Aspergillus</i> ; <i>Coccidioides</i>                                                                                                                                                                                                                                                       | <u>Malignant tumors</u> : sarcoma; lymphoma germ cell tumor<br><u>Others</u> : hamartoma; arteriovenous malformations                                                                                                                              |
| Multiple focal pulmonary nodules<br>- Noncalcified<br>- Calcified                             | <u>Mycobacteria</u> : <i>M. tb</i> ; MAC<br><u>Bacteria</u> : septic pulmonary emboli due to <i>S. aureus</i> ;<br><i>Nocardia</i><br><u>Atypical Bacteria</u> : <i>M. pneumoniae</i> ; <i>Legionella</i> ; <i>C. psittaci</i><br><u>Fungi</u> : <i>Aspergillus</i> ;<br><i>Cryptococcus</i> ; <i>Histoplasma</i> ;<br><i>Coccidioides</i> ; <i>Candida</i><br><u>Viruses</u> : CMV; VZV; HSV;<br>HPV | <u>Malignant tumors</u> : sarcoma; lymphoma; Wilms' tumor<br><u>Autoimmune</u> : granulomatosis with polyangiitis (Wegener's)<br><u>Others</u> : hamartoma; recurrent pulmonary aspirations; hypersensitivity pneumonitis; pulmonary hemosiderosis |
| Diffuse pulmonary micronodules                                                                | <u>Bacteria</u> : streptococci & <i>Listeria</i> (esp. neonates)<br><u>Mycobacteria</u> : <i>M. tb</i> (miliary disease)<br><u>Fungi</u> : <i>Aspergillus</i> ;<br><i>Cryptococcus</i> ; <i>Histoplasma</i> ;<br><i>Coccidioides</i> ; mucormycosis                                                                                                                                                   | <u>Malignant tumors</u> : sarcoma<br><u>Benign tumors</u> : inflammatory myofibroblastic tumor<br><u>Others</u> : toxic fume inhalation; alveolar hemorrhage syndrome                                                                              |
| <b>Pneumonia</b>                                                                              |                                                                                                                                                                                                                                                                                                                                                                                                       |                                                                                                                                                                                                                                                    |
| Acute lobar pneumonia                                                                         | <u>Viruses</u> : RSV; influenza; parainfluenza; adenovirus; metapneumovirus<br><u>Bacteria</u> : <i>S. pneumoniae</i> ; <i>S. aureus</i> ; <i>S. pyogenes</i> ; <i>H. influenzae</i> ; <i>K. pneumoniae</i>                                                                                                                                                                                           | <u>Congenital malformations</u> : bronchopulmonary sequestration; bronchogenic cyst; tracheoesophageal fistula<br><u>Others</u> : pulmonary infarct                                                                                                |

|                                                                        |                                                                                                                                                                                                                                                                                                                                                                                                                      |                                                                                                                                                                                                                                                     |
|------------------------------------------------------------------------|----------------------------------------------------------------------------------------------------------------------------------------------------------------------------------------------------------------------------------------------------------------------------------------------------------------------------------------------------------------------------------------------------------------------|-----------------------------------------------------------------------------------------------------------------------------------------------------------------------------------------------------------------------------------------------------|
|                                                                        | <u>Mycobacteria</u> : <i>M. tb</i>                                                                                                                                                                                                                                                                                                                                                                                   |                                                                                                                                                                                                                                                     |
| Subacute lobar pneumonia                                               | <u>Atypical Bacteria</u> : <i>M. pneumoniae</i> , <i>C. pneumoniae</i><br><u>Viruses</u> : adenovirus<br><u>Mycobacteria</u> : <i>M. tb</i> ; MAC; <i>M. abscessus</i>                                                                                                                                                                                                                                               | <u>Aspiration syndromes</u> : aspiration pneumonia                                                                                                                                                                                                  |
| Chronic lobar pneumonia                                                | <u>Bacteria</u> : <i>Actinomyces</i> ; <i>B. anthracis</i> ; anaerobes<br><u>Atypical Bacteria</u> : <i>M. pneumoniae</i> ; <i>C. pneumoniae</i> ; <i>F. tularensis</i><br><u>Mycobacteria</u> : <i>M. tb</i> ; MAC; <i>M. abscessus</i><br><u>Fungi</u> : <i>Histoplasma</i> ; <i>Coccidioides</i> ; <i>Blastomyces</i> ; <i>Cryptococcus</i><br><u>Parasites</u> : <i>Paragonimus</i>                              | <u>Aspiration syndromes</u> : aspiration pneumonia; foreign body                                                                                                                                                                                    |
| Cavitary pulmonary disease<br>- Solitary cavity<br>- Multiple cavities | <u>Bacteria</u> : <i>S. aureus</i> ; <i>K. pneumoniae</i> ; <i>Actinomyces</i> ; <i>Nocardia</i> ; anaerobes<br><u>Mycobacteria</u> : <i>M. tb</i> (progressive Ghon focus)<br><u>Fungi</u> : <i>Histoplasma</i> ; <i>Coccidioides</i> ; <i>Aspergillus</i> ; <i>Pneumocystis</i><br><u>Viruses</u> : HPV; influenza; measles<br><u>Parasites</u> : <i>Paragonimus</i> ; <i>E. histolytica</i> ; <i>Echinococcus</i> | <u>Malignant tumors</u> : lymphoma<br><u>Benign tumors</u> : inflammatory pseudotumor<br><u>Autoimmune</u> : granulomatosis with polyangiitis (Wegener's)<br><u>Others</u> : cystic bronchiectasis; congenital; sarcoidosis; traumatic pneumatocele |
| <b>Airway Disease</b>                                                  |                                                                                                                                                                                                                                                                                                                                                                                                                      |                                                                                                                                                                                                                                                     |
| Subacute/Chronic bronchitis                                            | <u>Virus</u> : post-viral reactive airways disease<br><u>Atypical Bacteria</u> : <i>M. pneumoniae</i> ; <i>C. pneumoniae</i><br><u>Bacteria</u> : protracted bacterial bronchitis ( <i>H. influenzae</i> ; <i>S. pneumoniae</i> ; <i>M. catarrhalis</i> )<br><u>Mycobacteria</u> : <i>M. tb</i><br><u>Fungi</u> : <i>Aspergillus</i> (e.g., ABPA)                                                                    | <u>Obstructive airway diseases</u> : asthma; cystic fibrosis<br><u>Others</u> : bronchomalacia; gastroesophageal reflux; airway irritation by smoke or air pollution                                                                                |
| Endobronchial granulomas                                               | <u>Mycobacteria</u> : <i>M. tb</i> ; MAC                                                                                                                                                                                                                                                                                                                                                                             | <u>Autoimmune</u> : eosinophilic granulomatosis                                                                                                                                                                                                     |

|                        |                                                                                                                                                                                                                                                                                                                                                                    |                                                                                                                                                             |
|------------------------|--------------------------------------------------------------------------------------------------------------------------------------------------------------------------------------------------------------------------------------------------------------------------------------------------------------------------------------------------------------------|-------------------------------------------------------------------------------------------------------------------------------------------------------------|
|                        | <u>Viruses</u> : HPV                                                                                                                                                                                                                                                                                                                                               | with polyangiitis<br><u>Others</u> : sarcoidosis                                                                                                            |
| Tree-in-bud pattern    | <u>Mycobacteria</u> : <i>M. tb</i> ; MAC<br><u>Fungi</u> : <i>Aspergillus</i> ;<br><i>Pneumocystis</i><br><u>Viruses</u> : RSV; parainfluenza                                                                                                                                                                                                                      | <u>Mucociliary disorders</u> : cystic fibrosis;<br>primary ciliary dyskinesia<br><u>Autoimmune</u> : rheumatoid arthritis                                   |
| Bronchiectasis         | Sequelae of chronic/severe airway infections due to the following:<br><u>Bacteria</u> : <i>S. aureus</i> ; <i>K. pneumoniae</i> ; <i>B. pertussis</i><br><u>Mycobacteria</u> : <i>M. tb</i> ; MAC<br><u>Viruses</u> : influenza; RSV; adenovirus; measles<br><u>Fungi</u> : <i>Aspergillus</i>                                                                     | <u>Mucociliary disorders</u> : cystic fibrosis;<br>primary ciliary dyskinesia<br><u>Aspiration syndromes</u> : recurrent pulmonary aspiration; foreign body |
| <b>Pleural Disease</b> |                                                                                                                                                                                                                                                                                                                                                                    |                                                                                                                                                             |
| Pleural effusion       | <u>Bacteria</u> : <i>S. pneumoniae</i> ; <i>S. aureus</i> ; <i>H. influenzae</i> ; <i>P. aeruginosa</i> ; <i>Actinomyces</i><br><u>Atypical Bacteria</u> : <i>M. pneumoniae</i><br><u>Virus</u> : adenovirus; influenza<br><u>Mycobacteria</u> : <i>M. tb</i><br><u>Fungi</u> : <i>Aspergillus</i> ;<br><i>Histoplasma</i><br><u>Parasite</u> : <i>Paragonimus</i> | <u>Malignant tumors</u> : lymphoma<br><u>Autoimmune</u> : systemic lupus erythematosus<br><u>Vascular</u> : lymphatic disorders                             |
| Chylothorax            | <u>Mycobacteria</u> : <i>M. tb</i><br>(mediastinal lymph node disease)<br><u>Fungi</u> : <i>Histoplasma</i><br>(mediastinal lymph node disease)                                                                                                                                                                                                                    | <u>Malignant tumors</u> : lymphoma; teratoma; sarcoma; neuroblastoma<br><u>Others</u> : thoracic duct injury; congenital malformation; sarcoidosis          |

**ABPA**: allergic bronchopulmonary aspergillosis; **B. anthracis**: *Bacillus anthracis*; **B. henselae**: *Bartonella henselae*; **B. pertussis**: *Bordetella pertussis*; **CMV**: cytomegalovirus; **C. pneumoniae**: *Chlamydomphila pneumoniae*; **C. psittaci**: *Chlamydia psittaci*; **E. histolytica**: *Entamoeba histolytica*; **F. tularensis**: *Francisella tularensis*; **H. influenzae**: *Haemophilus influenzae*; **HIV**: human immunodeficiency virus; **HPV**: human papillomavirus; **HSV**: herpes simplex virus; **K. pneumoniae**: *Klebsiella pneumoniae*; **M. abscessus**: *Mycobacterium abscessus*; **M. catarrhalis**: *Moraxella catarrhalis*; **M. pneumoniae**: *Mycoplasma pneumoniae*; **M. tb**: *Mycobacterium tuberculosis*; **MAC**: *Mycobacterium avium* complex; **P. aeruginosa**: *Pseudomonas aeruginosa*; **RSV**: respiratory syncytial virus; **S. aureus**: *Staphylococcus aureus*; **S. pneumonia**: *Streptococcus pneumonia*; **S. pyogenes**: *Streptococcus pyogenes*; **VZV**: varicella zoster virus

Adapted from C.M. Perez-Velez. Diagnosis of Intrathoracic Tuberculosis in Children. In: Handbook of Child and Adolescent Tuberculosis (p. 157-159), J.R. Starke and P.R. Donald (Eds.), 2016, New York, NY: Oxford University Press. Copyright by Oxford University Press [15]. Adapted with permission.

### **Supplementary Textbox 1. Spectrum of possible organ involvement in TB disease**

- **Respiratory System** (including chest): lungs; pleura; larynx; nasopharynx; sinuses.
- **Reticuloendothelial System:** lymph nodes; bone marrow; liver; spleen.
- **Cardiovascular System:** pericardium; myocardium.
- **Central Nervous System** (including head, neck, ears, and eyes): meninges; brain; orbit; optic neuritis; retina; uvea; sclera; conjunctiva.
- **Musculoskeletal System:** bone; joint; bursa; muscle.
- **Urinary System:** kidneys; ureters; bladder.
- **Alimentary/Digestive System** (including abdomen): oral cavity; esophagus; intestine; peritoneum; liver; gallbladder.
- **Endocrine System:** pancreatic; adrenal; thyroid; parathyroid; breast; pituitary; testicular; ovarian.
- **Reproductive/Genital System:** uterine; oviduct; vulva; prostate; epididymis; penis.
- **Integumentary System:** skin.

Adapted from C.M. Perez-Velez. Diagnosis of Intrathoracic Tuberculosis in Children. In: Handbook of Child and Adolescent Tuberculosis (p. 151), J.R. Starke and P.R. Donald (Eds.), 2016, New York, NY: Oxford University Press. Copyright by Oxford University Press [15]. Adapted with permission.

### **Supplementary Textbox 2. Risk factors for TB infection in children**

**Close contact with an adult or adolescent with confirmed or suspected pulmonary TB**

**Close contact with an adult or adolescent known to have TB infection**

**Having one of the following risk factors for TB infection, or having a close contact with an adult or adolescent having one of them:**

- Birth in, or travel to, an area of the world that is endemic for TB (especially during the last five years)
- Residing or working with persons who are at high risk for TB in a congregate setting such as a:
  - healthcare institution that cares for high-risk patients (if infection control is not adequate), including:
    - general and psychiatric hospitals and clinics
    - urgent care centre
    - physician's office
    - skilled nursing facility
  - long-term residential facilities



- correctional institution
- homeless shelter
- Homelessness
- Illicit drug use, particularly by injection
